# Supplementary material
Source: PubMed Central journal article supplement (PMC2762424)

**a.**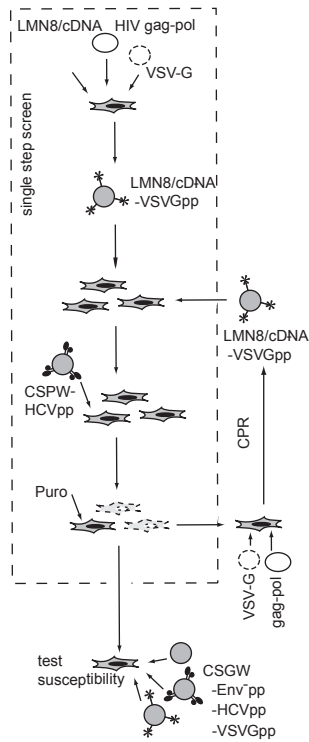**b.**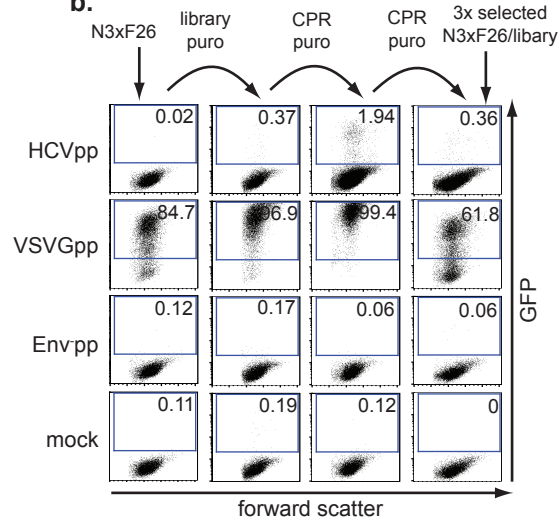**c.**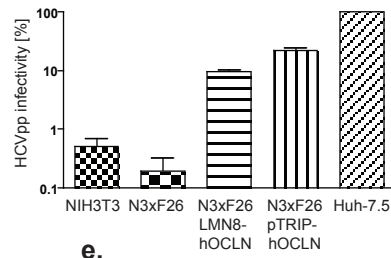**d.**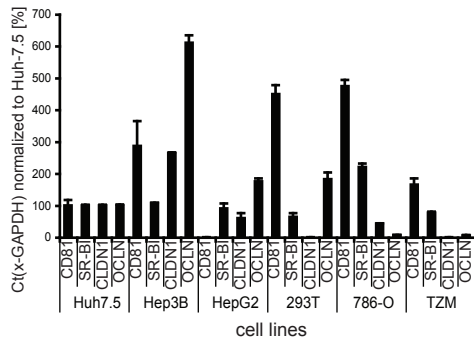**e.**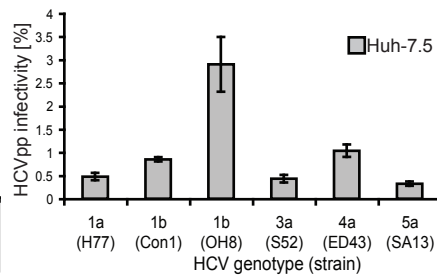

Supplement: NIHMS102188-supplement-1.pdf [file NIHMS102188-supplement-1.pdf]

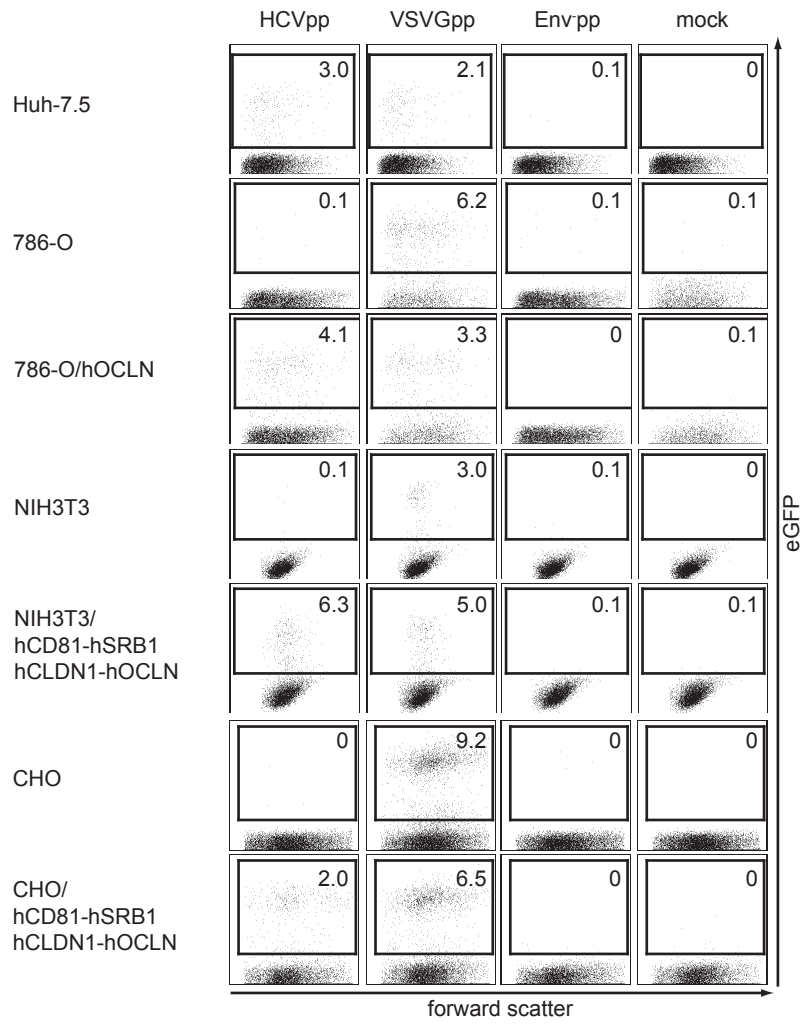

Supplement: NIHMS102188-supplement-2.pdf [file NIHMS102188-supplement-2.pdf]

**a.**

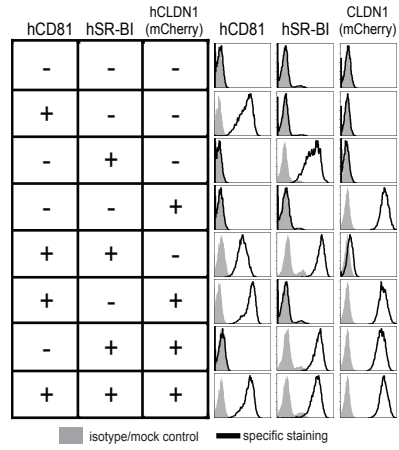

**b.**

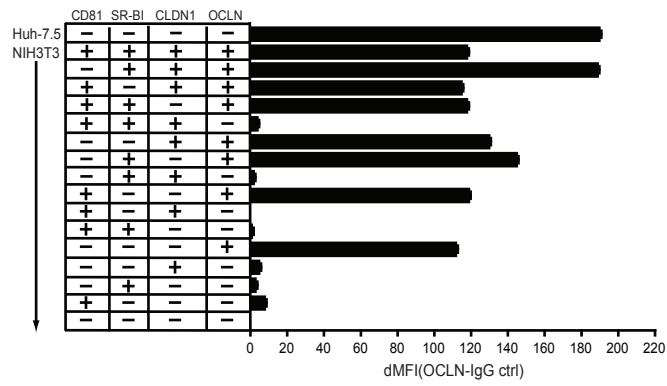

Supplement: NIHMS102188-supplement-3.pdf [file NIHMS102188-supplement-3.pdf]

**a.**

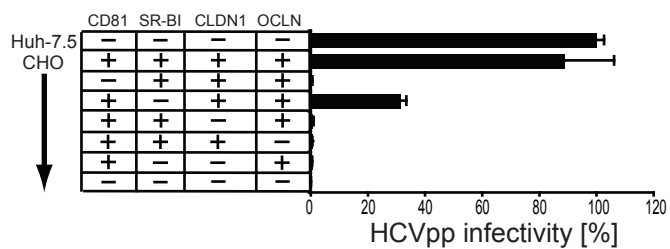

**b.**

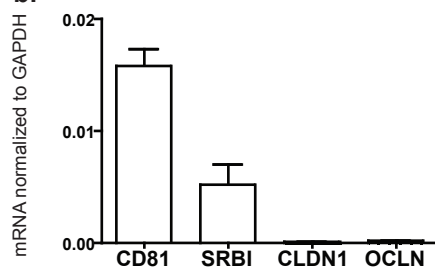

**c.**

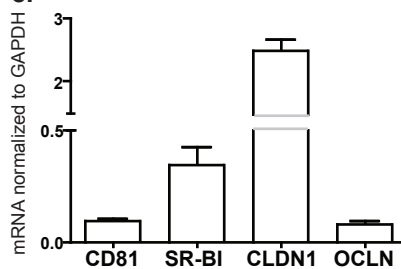

**d.**

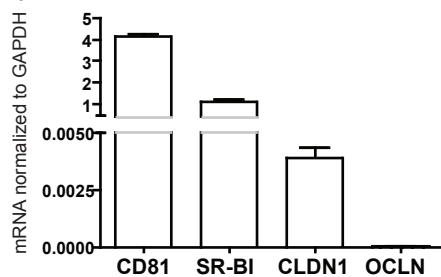

**e.**

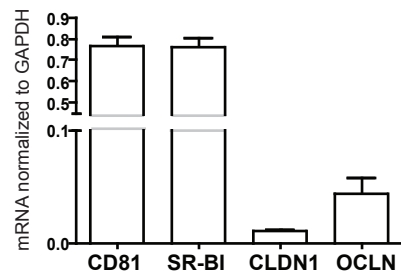

Supplement: NIHMS102188-supplement-4.pdf [file NIHMS102188-supplement-4.pdf]
